# Supplementary material for: The AKT-p21 phosphorylation signaling axis confers poor prognosis and dacarbazine resistance in melanoma
Source: Research Square preprint supplement (doi:10.21203/rs.3.rs-7077835/v1), 2025-08-07
Supplement: Supplementary file 1 [file fcdac534f479c65da07a12f8.docx]

**Supplementary Material**


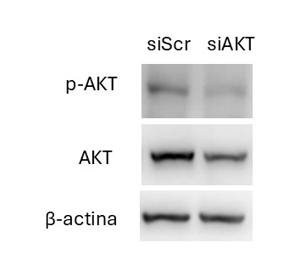


**Figure S1. Validation of AKT silencing by siRNA**. The levels of Akt and p-AKT expression was evaluated in 4C11+ cells knocked down for AKT with siRNA. Β-actin was used as internal controls. siScr: scrambled siRNA

**
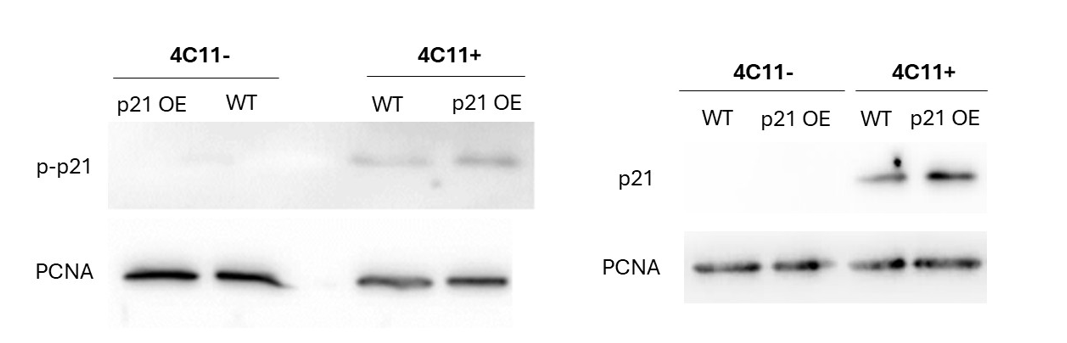
**

**FIGURE S2. The overexpression of p21 affects p-p21 in 4C11+, but not in 4C11- cells.** The levels of p21 and p-p21 (Thr145) were evaluated in 4C11- and 4C11+ cells overexpressing (p21 OE) or not (WT) p21, by western blot using specific antibody. PCNA expression was used as a loading control.

**
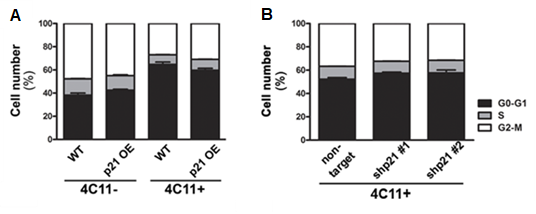
**

**FIGURE S3. The modulation of p21 expression does not affect cell cycle in 4C11- and 4C11+ melanoma cells.** The different phases of the cell cycle were evaluated by flow cytometry in the wild type (WT) and p21-overexpressing (p21 OE) 4C11- and 4C11+ cell lines (**A**) and non-target and p21-knocked down clones shp21 #1 and shp21 #2 (**B**).
